# Supplementary material for: Feasibility and Effectiveness of Using Wearable Activity Trackers in Youth: A Systematic Review
Source: PubMed Central journal article supplement (PMC5143467; doi:10.2196/mhealth.6540), 2016-11-23
Supplement: mhealth_v4i4e129_app1.pdf [file mhealth_v4i4e129_app1.pdf]

## Appendix 1: Search strategy for each database

| Database         | Search String                                                                                                                                                                                                                                                                                                                                                                                                                      | Results |
|------------------|------------------------------------------------------------------------------------------------------------------------------------------------------------------------------------------------------------------------------------------------------------------------------------------------------------------------------------------------------------------------------------------------------------------------------------|---------|
| PubMed           | (((((electronic track* OR electronic activ* AND track* OR electronic activ* AND monitor* OR electronic fitness track* OR wearable device OR wearable act* AND track* OR consumer wearable OR Fitbit OR Jawbone OR Nike Fuelband OR SenseWear OR PAM))) AND ((Intervention OR trial OR feasibility))) AND ((Child* OR Adolescent* OR youth))) AND ((Physical act* OR Exerc* OR Fitness OR Energy expenditure))                      | 33      |
| Scopus           | (electronic track* OR electronic activ* AND track* OR electronic activ* AND monitor* OR electronic fitness track* OR wearable device OR wearable act* AND track* OR consumer wearable OR Fitbit OR Jawbone OR Nike Fuelband OR SenseWear OR PAM) AND (Intervention OR trial OR feasibility) AND (Child* OR Adolescent* OR youth) AND (Physical act* OR Exerc* OR Fitness OR Energy expenditure)                                    | 10      |
| ProQuest Central | <a href="#"><u>all(electronic track* OR electronic activ* AND track* OR electronic activ* AND monitor* OR electronic fitness track* OR wearable device OR wearable act* AND track* OR consumer wearable OR fitbit OR Jawbone OR Nike fuelband OR SenseWear OR PAM) AND all(Intervention OR trial OR feasibility) AND all(Child* OR Adolescent* OR youth) AND all(Physical act* OR Exerc* OR Fitness OR Energy expenditure)</u></a> | 114     |
| Web of Science   | TS=(electronic track* OR electronic activ* AND track* OR electronic activ* AND monitor* OR electronic fitness track* OR wearable device OR wearable act* AND track* OR consumer wearable OR fitbit OR Jawbone OR Nike fuelband OR Sensewear OR PAM) AND TS=(Intervention OR trial OR feasibility) AND TS=(Child* OR Adolescent* OR youth) AND TS=(Physical act* OR Exerc* OR Fitness OR Energy expenditure)                        | 94      |
| SPORTDiscus      | AB ( (electronic track* OR electronic activ* AND track* OR electronic activ* AND monitor* OR electronic fitness track* OR wearable device OR wearable act* AND track* OR consumer wearable OR fitbit OR Jawbone OR Nike fuelband OR Sensewear OR PAM) ) AND AB ( (Intervention OR trial OR feasibility) ) AND AB ( (Child* OR Adolescent* OR youth) ) AND ( (Physical act* OR Exerc* OR Fitness OR Energy expenditure) )           | 8       |
